# Supplementary material
Source: Springer Nature journal article supplement (http://nhm.openrepository.com/nhm/bitstream/10141/622096/7/12862_2013_2443_MOESM5_ESM.docx)
Supplement: MOESM5 [file 12862_2013_2443_MOESM5_ESM.docx]

| **GenBank number** | **Region** | **GenBank ID** | **Closest sequence identity & placement in phylogeny** |
| --- | --- | --- | --- |
| EF438980 | matK | *Physalis* sp. | *Nicandra* |
| EF438857 | matK | *Physalis* sp. | *Nicandra* |
| AY028148 | ITS2 | *Jaborosa integrifolia* | *Nolana* |
| AY028130 | ITS1 | *Jaborosa integrifolia* | *Nolana* |
| AF244710 | ITS | *Jaltomata procumbens* | *Iochroma* |
| AB019288 | ITS1 | *Atropa belladonna* | *Anisodus* |
| AY028129 | ITS1 | *Atropa belladonna* | *Anisodus* |
| AY028147 | ITS2 | *Atropa belladonna* | *Anisodus* |
| AB019948 | ITS2 | *Atropa belladonna* | *Anisodus* |
| AF244709 | ITS | *Lycianthes heteroclita* | *Solanum* |
| DQ314160 | ITS | *Salpichroa tristis* | *Nicotiana* |
| AY478412 | ITS1 | *Scopolia japonica* | *Solanum* |
| AY478398 | ITS1 | *Scopolia japonica* | *Solanum* |
| AY478412 | ITS2 | *Scopolia japonica* | *Solanum* |
| AY478412 | ITS2 | *Scopolia japonica* | *Solanum* |
| GU591063 | ITS | *Solanum buddleifolium* | *Solanum viarum*, but with only 85% sequence similarity |
| AY996543 | ITS | *Solanum polygamum* | *Chamaesaracha* |

# Additional file 4

# Särkinen et al. “A phylogenetic framework for evolutionary study of the nightshades (Solanaceae): a dated 1000-tip tree”

**Table S4.** Details of sequences downloaded from GenBank but which were excluded from our analyses due to suspected erroneous voucher identification or sample contamination. Closest sequence identity was derived from BLAST searches, but sequence placement in the Maximum Likelihood topology was used to detect the questionable accessions.
